# Supplementary material for: Effect of Anti-inflammatory Treatment with AMD3100 and CX3CR1 Deficiency on GABAA Receptor Subunit and Expression of Glutamate Decarboxylase Isoforms After Stroke
Source: PubMed Central journal article supplement (PMC8599239; doi:10.1007/s12035-021-02510-x), 2021-08-20
Supplement: 12035_2021_2510_MOESM1_ESM.pdf [file 12035_2021_2510_MOESM1_ESM.pdf]

1 **Effect of anti-inflammatory treatment with AMD3100 and CX<sub>3</sub>CR1 deficiency on GABA<sub>A</sub>**  
2 **receptor subunit and GAD isoforms expression after stroke**

3 Georgios Michalettos<sup>1</sup>, Helene L Walter<sup>1,3</sup>, Ana Rita Pombo Antunes<sup>1</sup>, Tadeusz Wieloch<sup>1</sup>, Daniela  
4 Talhada<sup>1</sup> and Karsten Ruscher<sup>1,2</sup>

5

6 <sup>1</sup>Laboratory for Experimental Brain Research, Division of Neurosurgery, Department of Clinical  
7 Sciences, Wallenberg Neuroscience Center, Lund University, BMC A13, 22184, Lund, Sweden

8 <sup>2</sup>LUBIN Lab - Lunds Laboratorium för Neurokirurgisk Hjärnskadeforskning, Division of  
9 Neurosurgery, Department of Clinical Sciences, Lund University, Sweden

10 <sup>3</sup>Department of Neurology, Faculty of Medicine and University Hospital Cologne, University of  
11 Cologne, Cologne, Germany.

12

13 **MOLECULAR NEUROBIOLOGY**

14 **SUPPLEMENTARY MATERIAL**

15

16

17 \*Corresponding Author: Dr. Karsten Ruscher, Associate Professor, Laboratory for Experimental  
18 Brain Research, Wallenberg Neuroscience Center, Lund University, BMC A13, S-22184 Lund,  
19 Sweden. Tel +46-46-2220613. email: [karsten.ruscher@med.lu.se](mailto:karsten.ruscher@med.lu.se)

**Table 1** Sequences of gene specific primers and associated amplicon lengths

| <b><u>Gene</u></b>                  | <b><u>Forward (5'→3')</u></b> | <b><u>Reverse (5'→3')</u></b> | <b><u>Product size (bp)</u></b> |
|-------------------------------------|-------------------------------|-------------------------------|---------------------------------|
| <b><u>GAPDH</u></b>                 | TTCTCAAGCTCATTTC<br>TGGTATG   | GGATAGGGCCTCTCTT<br>GCTCA     | 143                             |
| <b><u>GABA(A)</u><br/><u>α3</u></b> | GTTCTCACCATGACCAC<br>CTT      | GTTGGAGCTGCTGGTG<br>TTT       | 153                             |
| <b><u>GABA(A)</u><br/><u>δ</u></b>  | CTCCCTGACACCTTCAT<br>CGT      | GTACTIONGGCGAGGTCC<br>ATGT    | 153                             |
| <b><u>GABA(A)</u><br/><u>β3</u></b> | GCCTTGATGACAGCCC<br>TTTA      | CATTGGCAACACAACC<br>ACTC      | 174                             |
| <b><u>GAD67</u></b>                 | GAACAACCATGGTGGG<br>CTAC      | GCCGATGATTCTGGTTC<br>TGT      | 166                             |
| <b><u>CXCR4</u></b>                 | TCAGTGGCTGACCTCCT<br>CTT      | CTTTTCAGCCAGCAGTT<br>TCC      | 222                             |

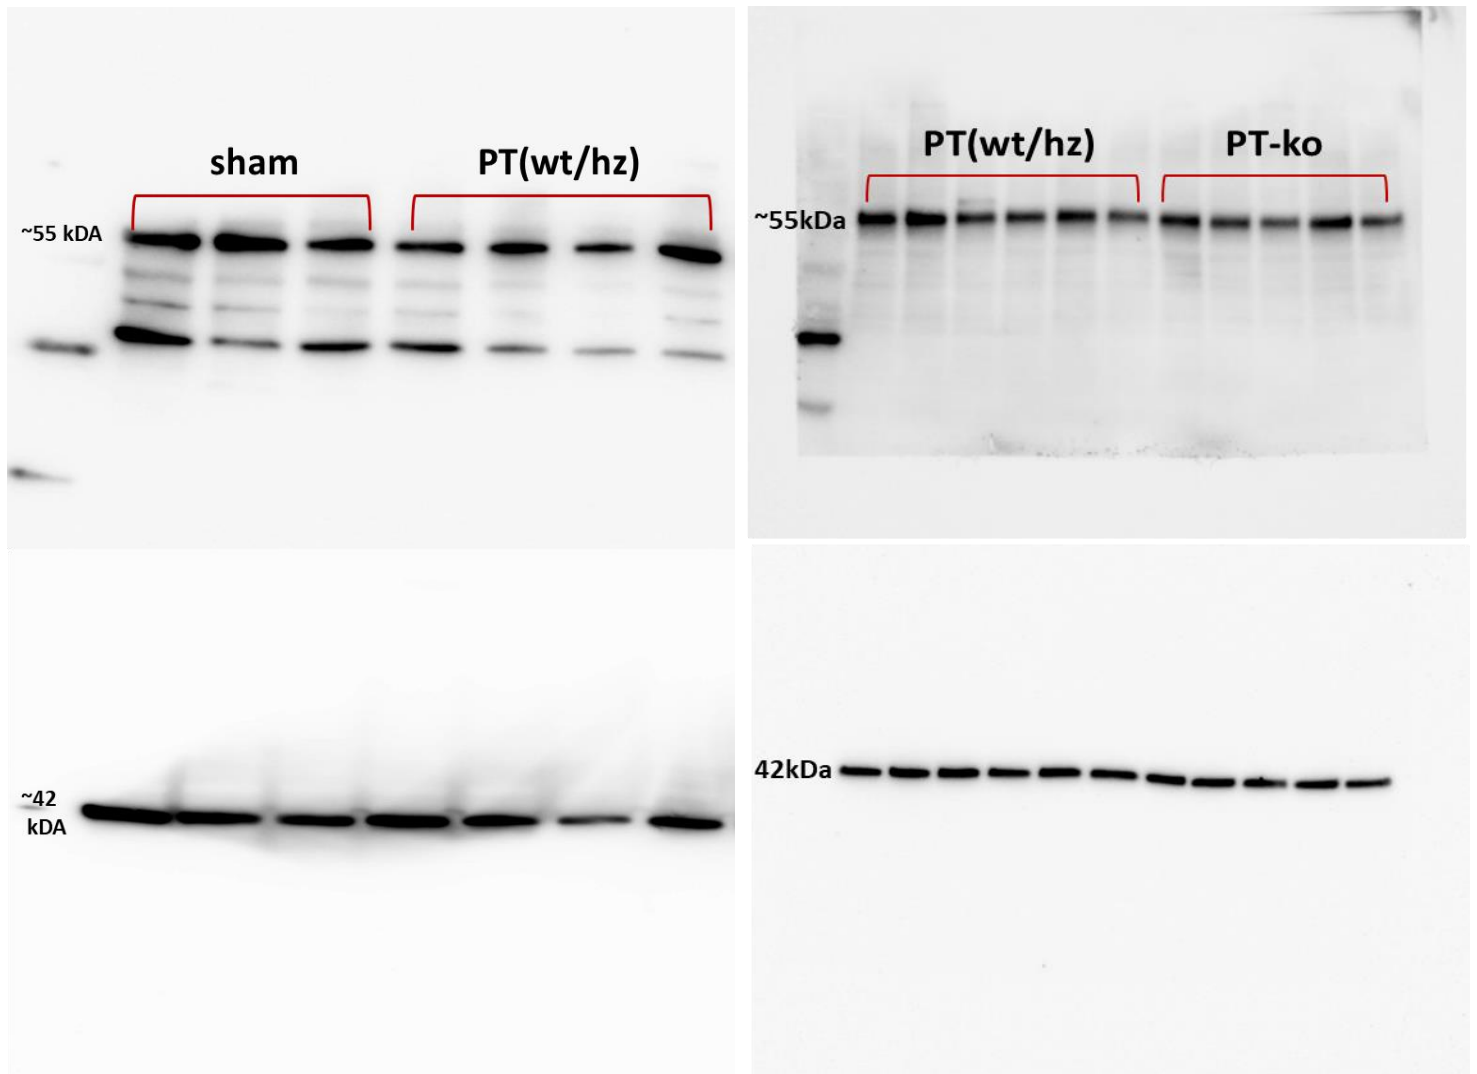

22 **Supp. Figure 1** Western Blot of the GABA<sub>A</sub> α3 subunit in the contralateral cortex of mice which underwent  
23 sham surgery and stroke-mice of day 14 after PT regarding CX3CR1 deficiency. Corresponding band size  
24 were 55kDa for α3 subunit and 42kDa for β-actin.

25

26

27

28

29

30

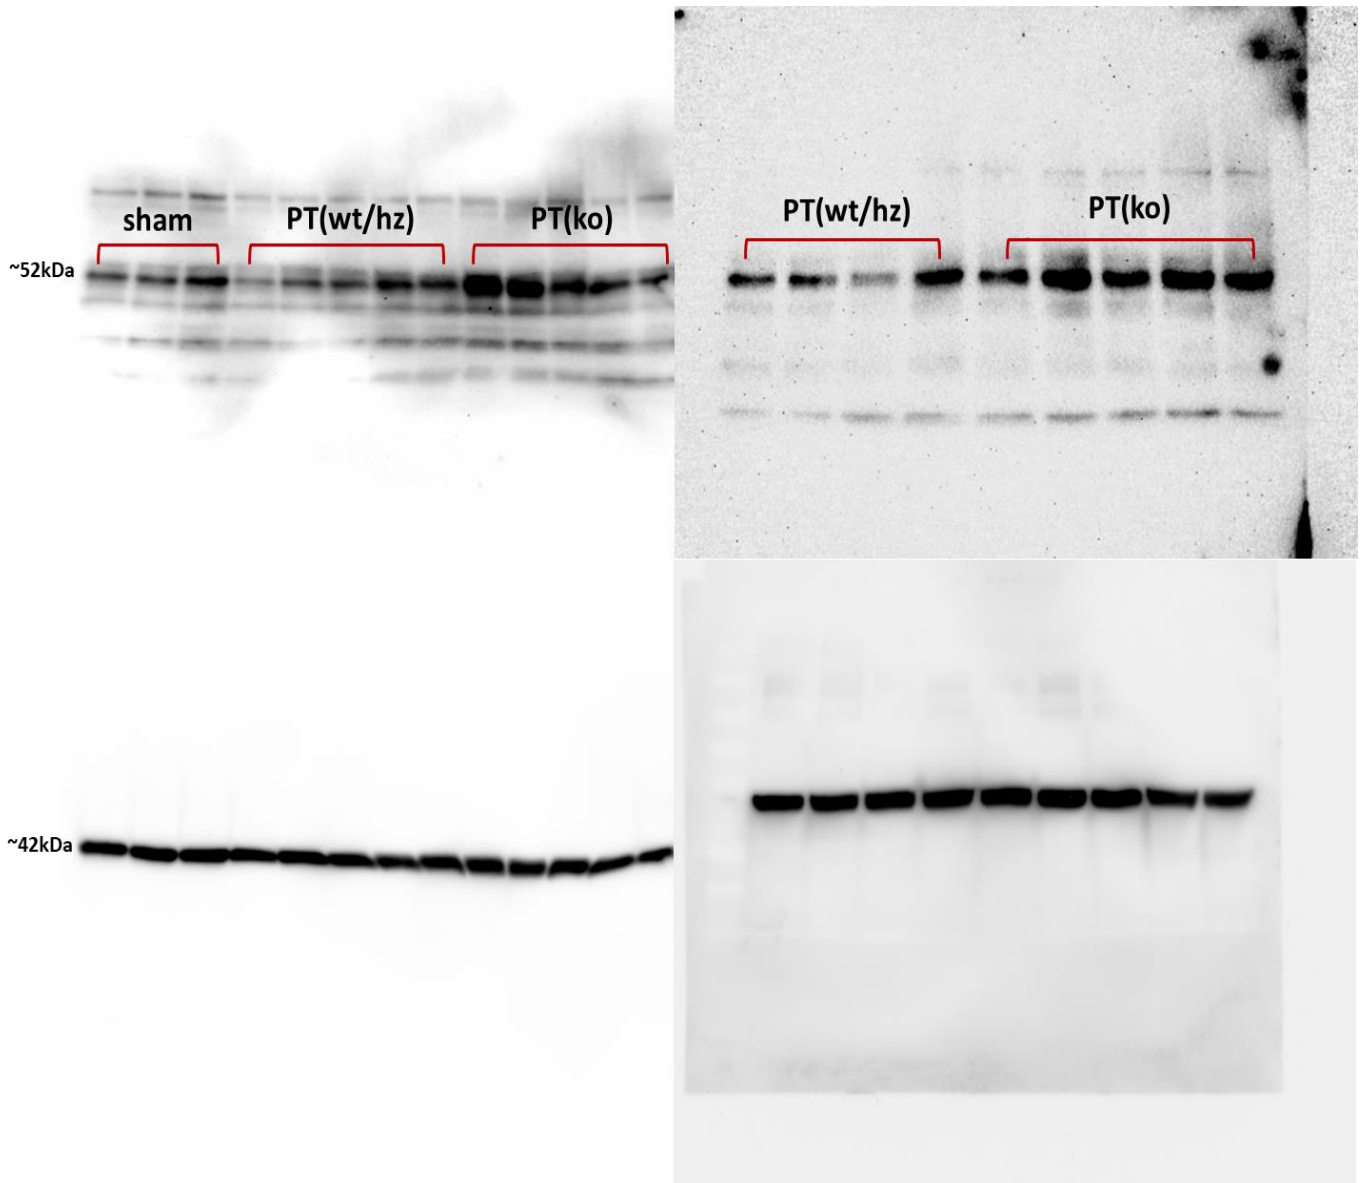

31

32 **Supp. Figure 2** Western Blot of the GABA<sub>A</sub> δ subunit in the contralateral cortex of mice which underwent  
33 sham surgery and stroke-mice of day 14 after PT regarding CX3CR1 deficiency. Corresponding band sizes  
34 were approximately 52kDa for δ subunit and 42kDa for β-actin. The comparison PT (wt/hz) VS PT (ko) was  
35 repeated in a second Western Blot in order to confirm results.

36

37

38

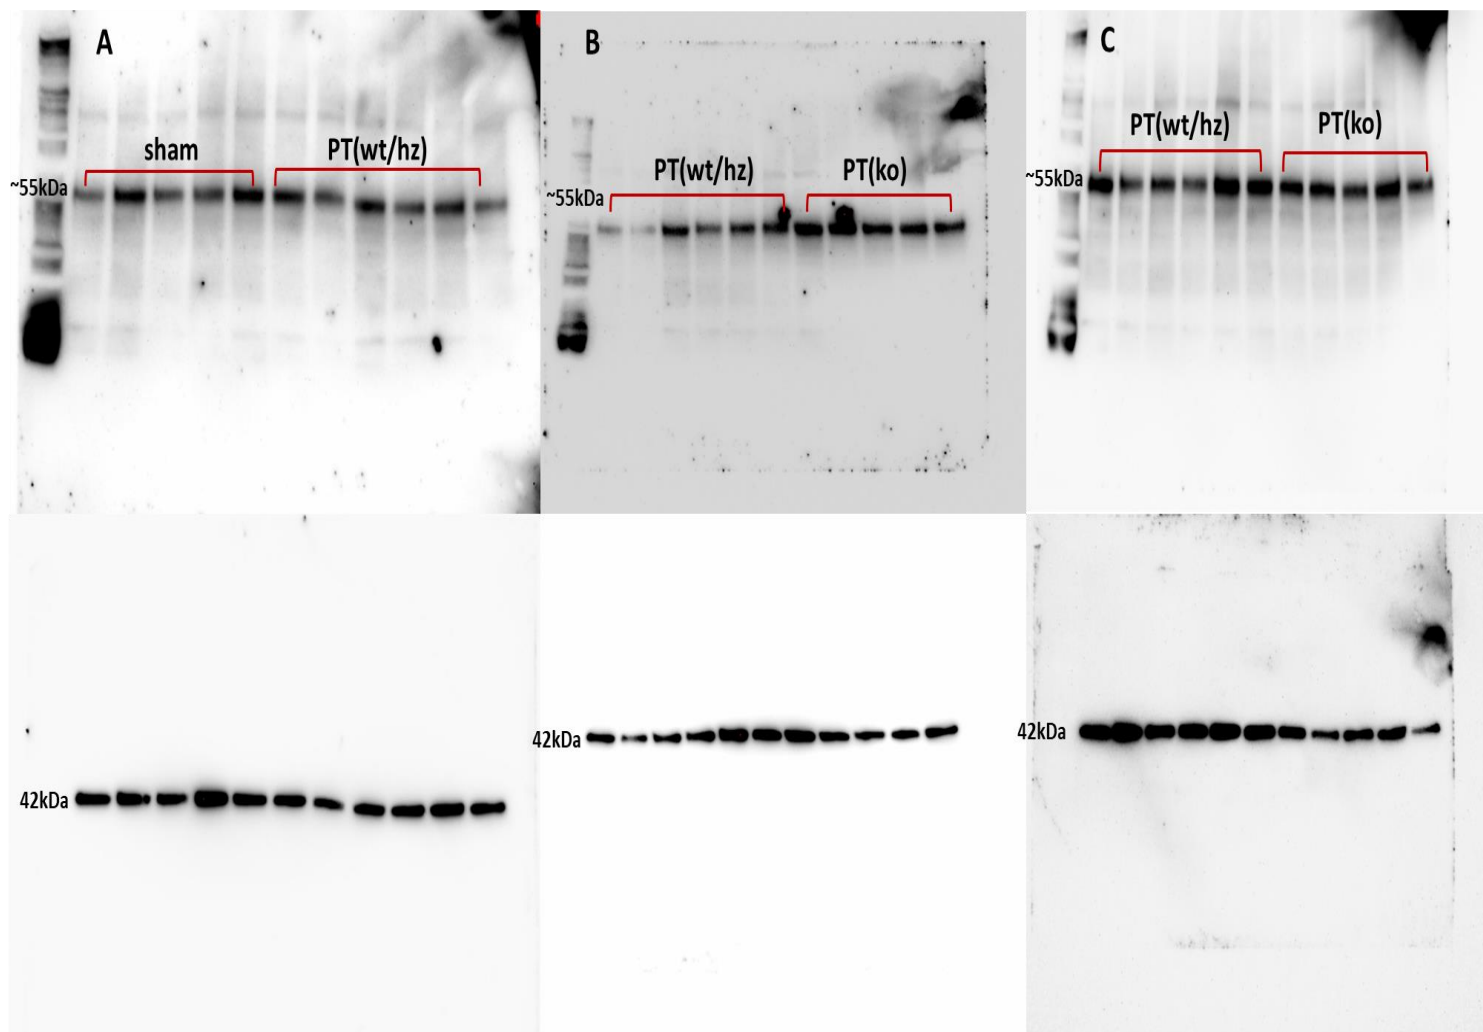

40 **Supp. Figure 3** Western Blot of the GABA<sub>A</sub> β3 subunit in the contralateral cortex of mice which underwent  
 41 sham surgery and stroke-mice of day 14 after PT regarding CX3CR1 deficiency. **(A)** Comparison between  
 42 contralateral cortex of sham and stroke mice and **(B, C)** comparison between wt/hz littermates and ko  
 43 mice which underwent stroke. Corresponding band sizes were approximately 55kDa for β3 subunit and  
 44 42kDa for β-actin. The comparison PT (wt/hz) VS PT (ko) was repeated twice **(B, C)** in order to confirm  
 45 results.

46

47

48

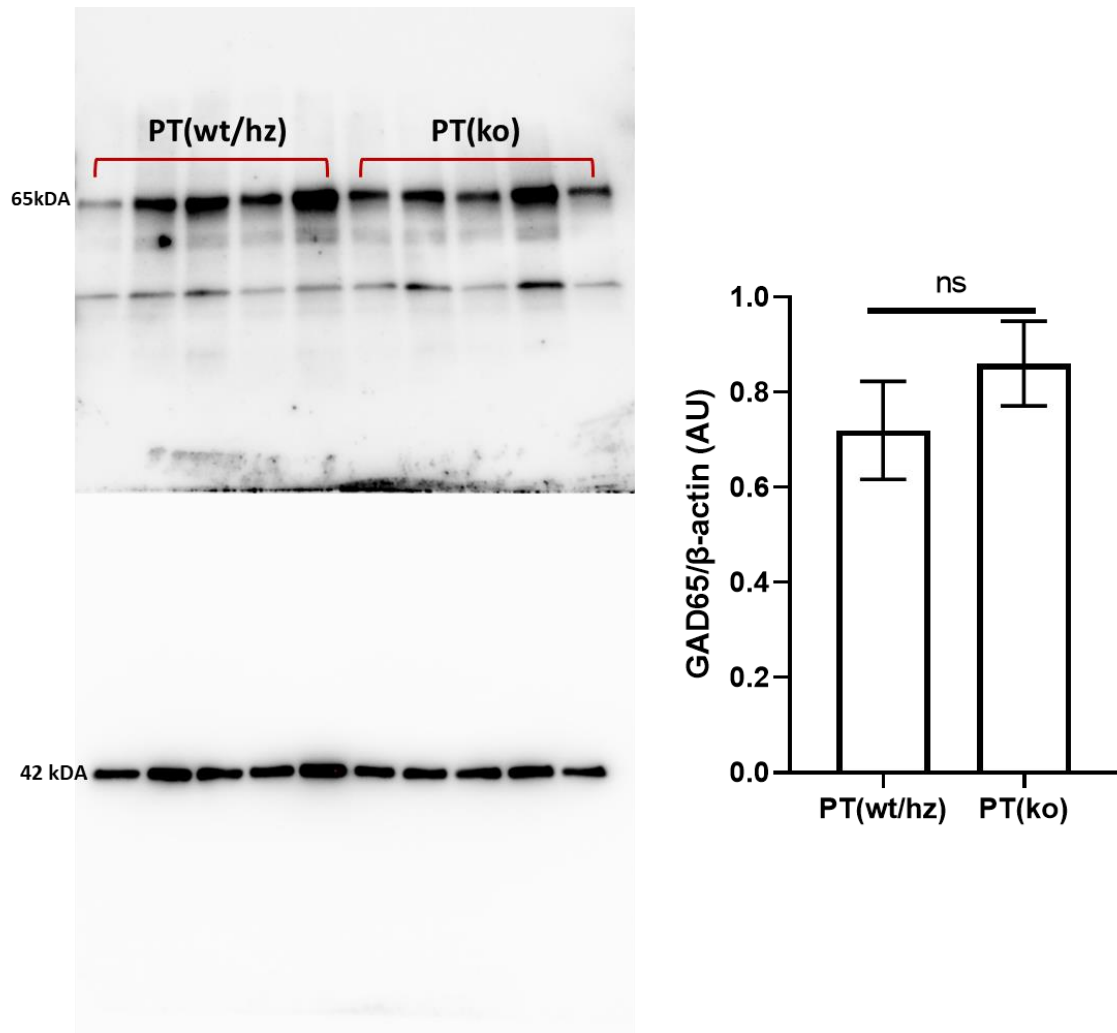

49

50 **Supp. Figure 4** Western Blot of GAD65 in stroke-mice of day 14 after PT in the contralateral cortex  
51 regarding the effect of CX3CR1 deficiency. Comparison between wt/hz and ko stroke mice. Corresponding  
52 band size were 65kDa for GAD65 and 42kDA for β-actin. No significant differences were observed with  
53 Student's t test ( $p = 0.33$ ).

54

55

56

57

58

A

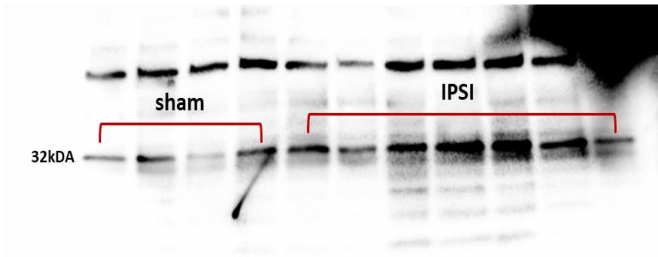

B

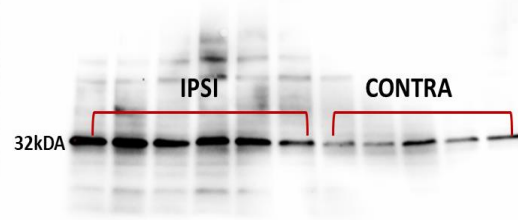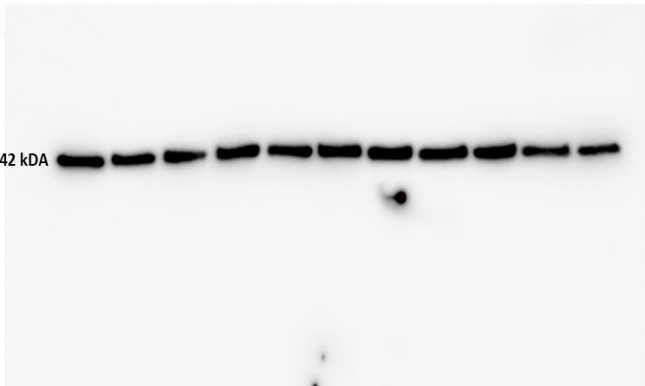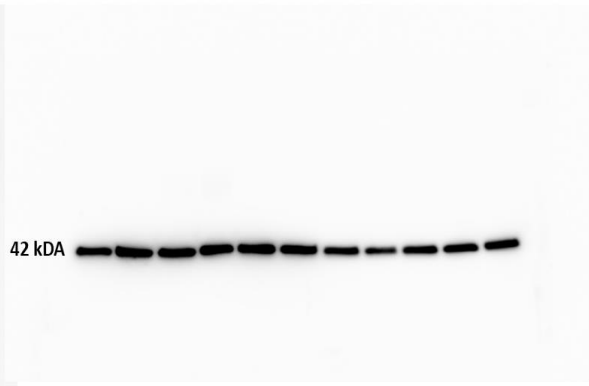

59

60 **Supp. Figure 5** Western Blot of CXCR4 in stroke-mice of day 14 after PT regarding the effect of AMD3100  
61 treatment. **(A)** Comparison between ipsilateral cortex of sham and stroke mice and **(B)** comparison of  
62 ipsilateral vs contralateral cortex of stroke mice. Corresponding band size were 32kDa for CXCR4 and  
63 42kDa for  $\beta$ -actin.

64

65

66

67

68

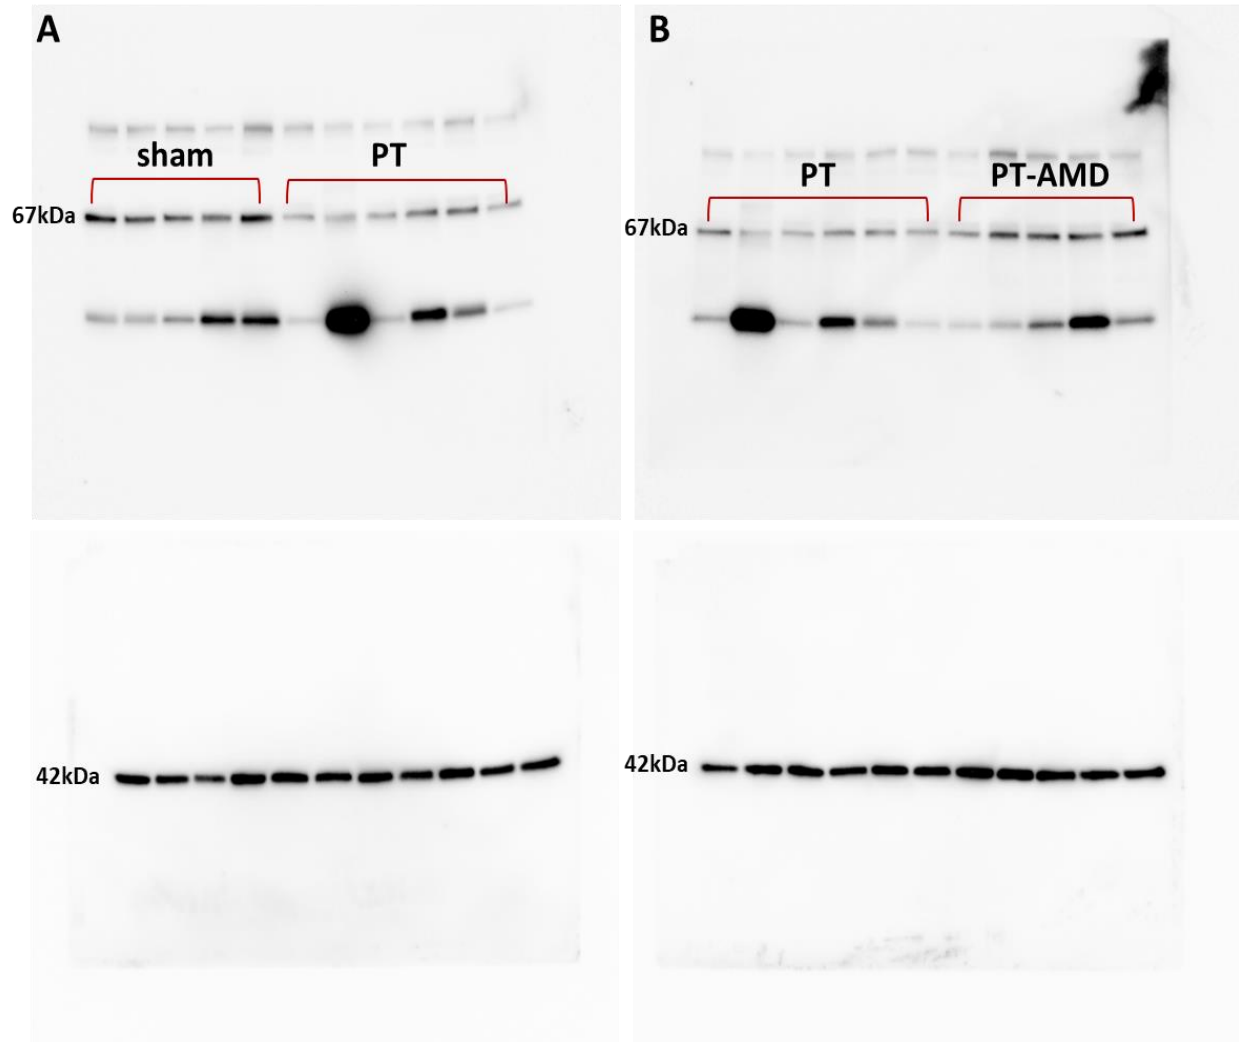

69

70 **Supp. Figure 6** Western Blot of GAD67 in the **contralateral** cortex of stroke-mice of day 14 after PT  
 71 regarding the effect of AMD3100 treatment. **(A)** Comparison of sham vs PT and **(B)** comparison of stroke-  
 72 mice treated with saline or AMD3100. Corresponding band size were 67kDa for GAD67 and 42kDa for  $\beta$ -  
 73 actin.

74



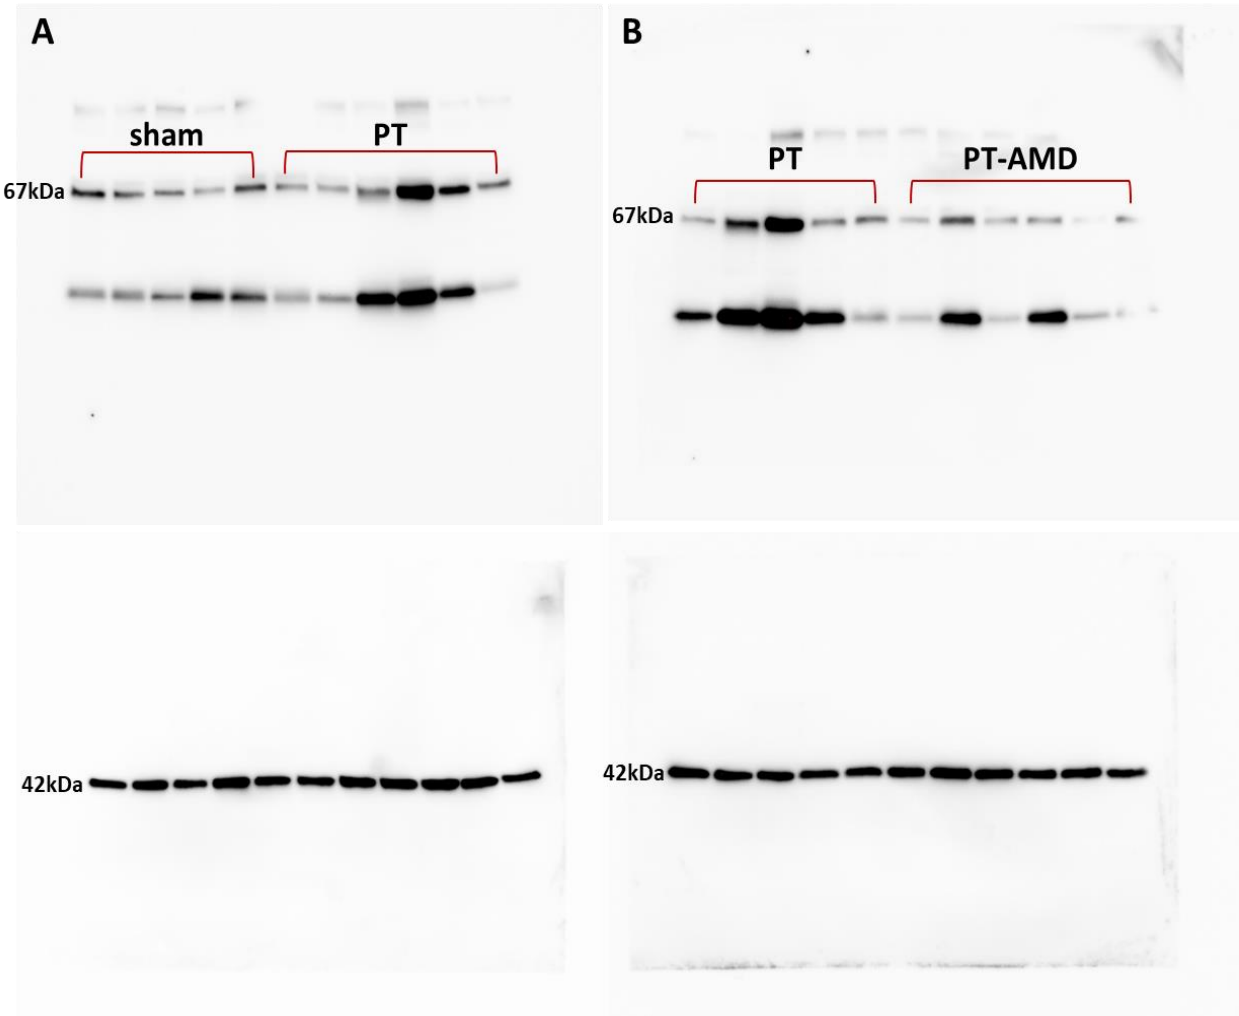

75

76 **Supp. Figure 7** Western Blot of GAD67 in the **ipsilateral** cortex of stroke-mice of day 14 after PT regarding  
 77 the effect of AMD3100 treatment. **(A)** Comparison of sham vs PT and **(B)** comparison of stroke-mice  
 78 treated with saline or AMD3100. Corresponding band size were 67kDa for GAD67 and 42kDA for  $\beta$ -actin.

79

80

81

82

83

84

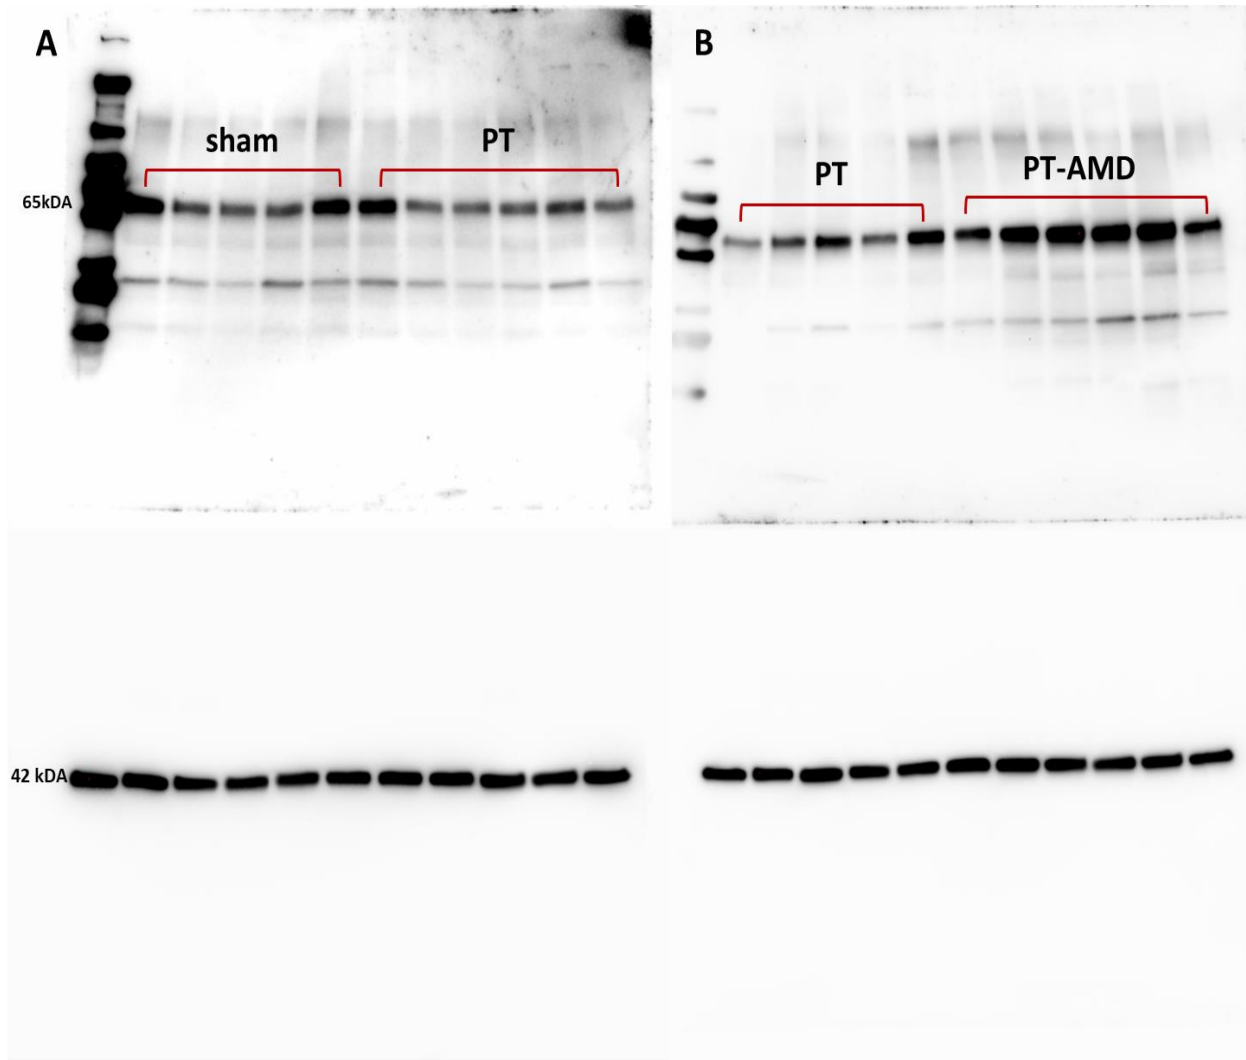

85

86 **Supp. Figure 8** Western Blot of GAD65 in the **contralateral** cortex of stroke-mice of day 14 after PT  
87 regarding the effect of AMD3100 treatment. **(A)** Comparison of sham vs PT and **(B)** comparison of stroke-  
88 mice treated with saline or AMD3100. Corresponding band size were 65kDa for GAD65 and 42kDa for  $\beta$ -  
89 actin.

90

91

92

93

94

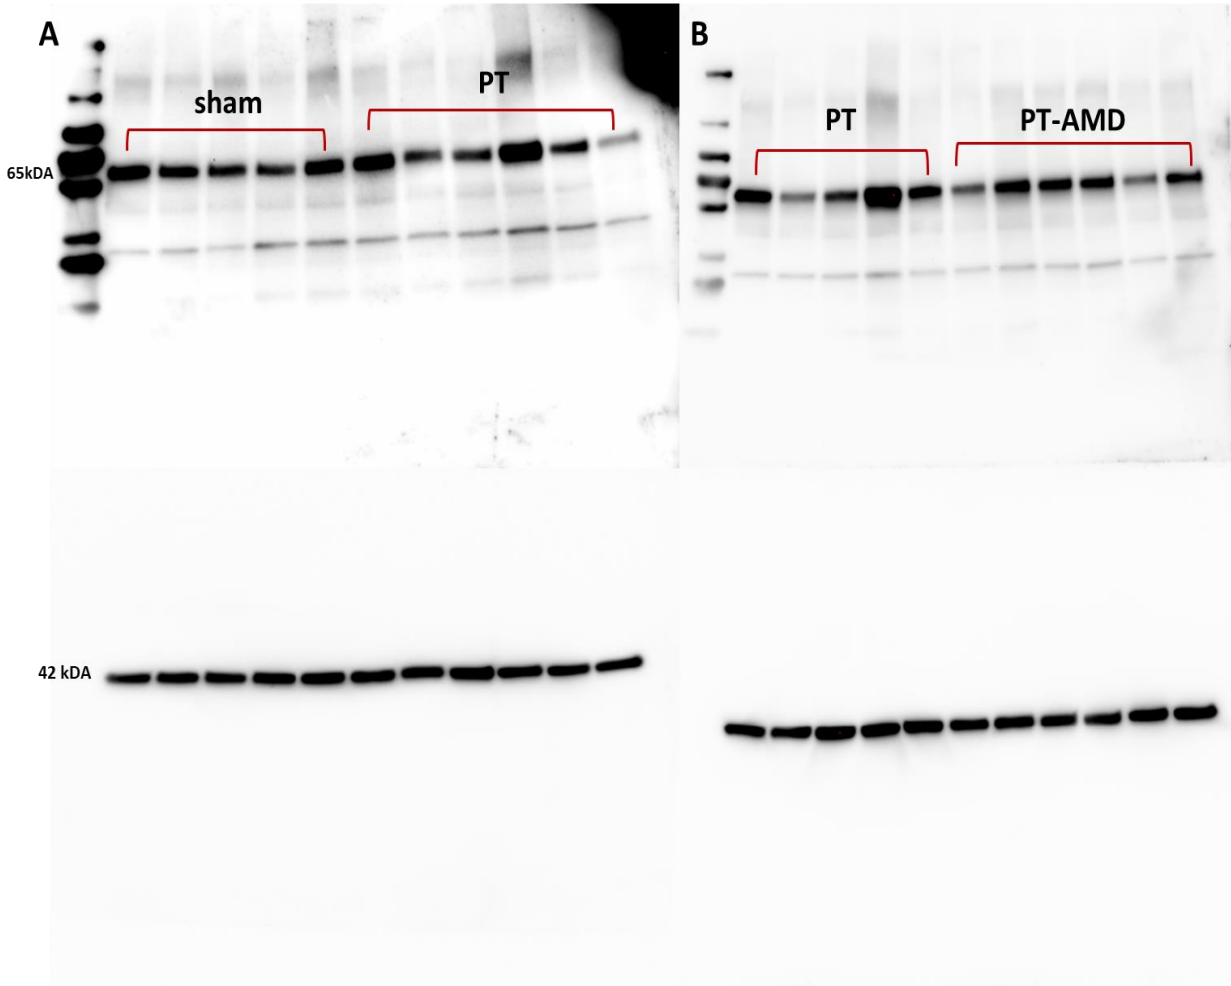

95

96 **Supp. Figure 9** Western Blot of GAD65 in the **ipsilateral** cortex of stroke-mice of day 14 after PT regarding  
 97 the effect of AMD3100 treatment. **(A)** Comparison of sham vs PT and **(B)** comparison of stroke-mice  
 98 treated with saline or AMD3100. Corresponding band size were 65kDa for GAD65 and 42kDa for  $\beta$ -actin.

99

100

101

102

103

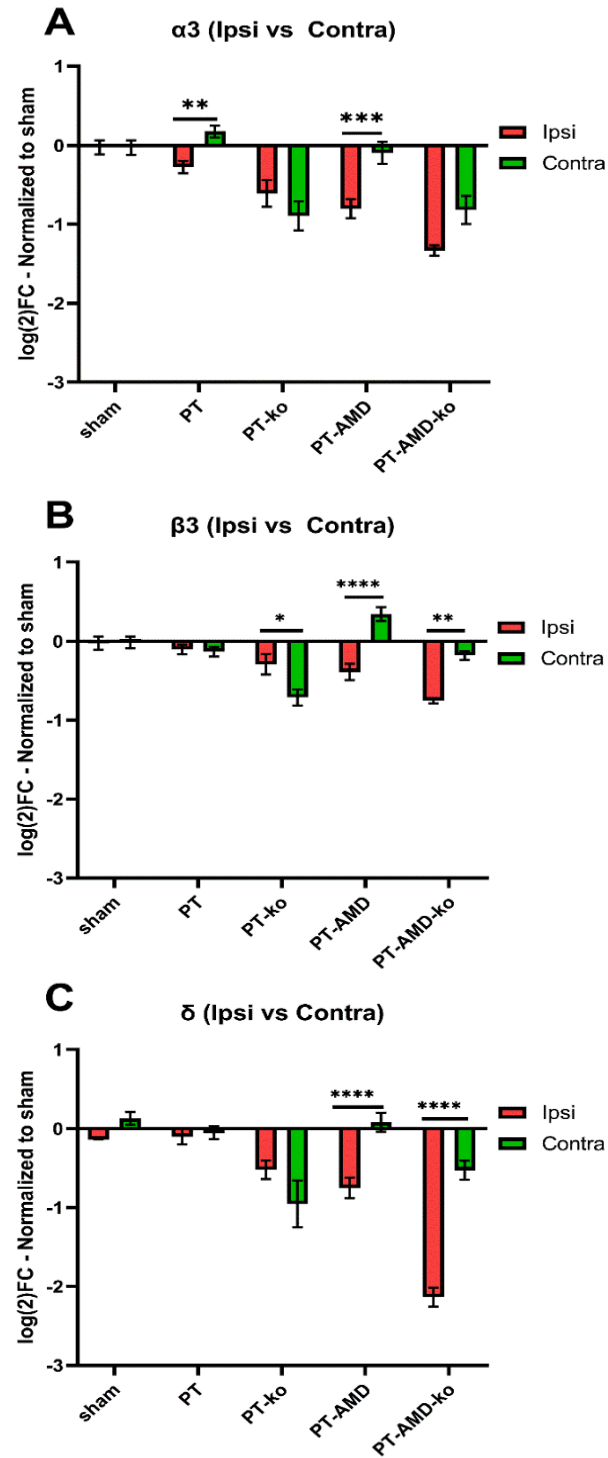

104

105 **Supp. Figure 10. Comparison of mRNA levels between the two hemispheres under different**

106 **experimental conditions mRNA levels of the  $\alpha_3$  (A), the  $\delta$  (B) and the  $\beta_3$  (C) GABA subunits in the**

107 **contralateral and ipsilateral cortex of mice. All data depicted are normalized to expression levels of**

108 sham/naive mice and shown as a log<sub>2</sub> fold-change. Bars represent the mean ± S.E.M. Statistically  
109 significant differences were observed through Two-Way ANOVA and *post-hoc* Sidak's Multiple  
110 Comparisons (\* p < 0.05, \*\* p < 0.005, \*\*\*\* p < 0.0001).
